# Supplementary material
Source: PubMed Central journal article supplement (PMC8178932)
Supplement: gaab018_supplementary_data.pdf [file gaab018_supplementary_data.pdf]

**Supplementary information: Genetic and epigenetic changes in the eutopic endometrium of women with endometriosis: association with decreased endometrial  $\alpha_v\beta_3$  integrin expression.**

Niraj R. Joshi<sup>1\*</sup>, Hamid-Reza Kohan-Ghadr<sup>1\*</sup>, Damian S. Roqueiro<sup>2</sup>, Jung Yoon Yoo<sup>3</sup>, Karenne Fru<sup>4</sup>, Eli Hestermann<sup>5</sup>, Lingwen Yuan<sup>6</sup>, Shuk-Mei Ho<sup>7</sup>, Jae-Wook Jeong<sup>1</sup>, Steven L. Young<sup>6</sup>, Bruce A. Lessey<sup>8</sup>, and Asgerally T. Fazleabas<sup>1,9</sup>

<sup>1</sup> Michigan State University, College of Human Medicine, Grand Rapids, MI, USA.

<sup>2</sup> Eidgenössische Technische Hochschule Zurich, Switzerland.

<sup>3</sup> Department of Biochemistry and Molecular Biology, Brain Korea 21 Project for Medical Sciences, Yonsei University College of Medicine, Seoul, South Korea.

<sup>4</sup> Coastal Reproductive Endocrinology and Infertility, Wilmington, NC, USA.

<sup>5</sup> Furman University, Greenville, SC, USA.

<sup>6</sup> University of North Carolina School of Medicine, Chapel Hill, NC, USA.

<sup>7</sup> University of Arkansas for Medical Sciences, AR, USA.

<sup>8</sup> Wake Forest Baptist Health, Winston-Salem, NC, USA.

<sup>9</sup> Corresponding Author: Prof. Asgerally T. Fazleabas Ph.D.,

Department of Obstetrics, Gynecology and Reproductive Biology,  
Michigan State University  
400 Monroe Ave NW,  
Grand Rapids, MI-49503. USA  
E-mail: [fazleaba@msu.edu](mailto:fazleaba@msu.edu)

**Supplemental Figure-1:** Principal Component Analysis for 83 DEGs identified in the HEI vs. C comparisons (A). Heatmap of differentially expressed genes the two groups (HEI and C) that cluster separately. Each column represents the individual sample, and each row represents the individual DEG in the HEI vs. C comparisons (B). The volcano plot shows the statistical significance (Y-Axis) against the fold change (X-Axis) between the HEI and C groups (C). Each blue dot represents the significantly decreased expression of an individual gene, and each red dot represents the significantly increased expression of a gene on the Volcano Plot. Dotted horizontal and vertical lines represent the cut-off fold change ( $\pm 1.5$  folds) and statistical significance ( $p < 0.05$ ), respectively.

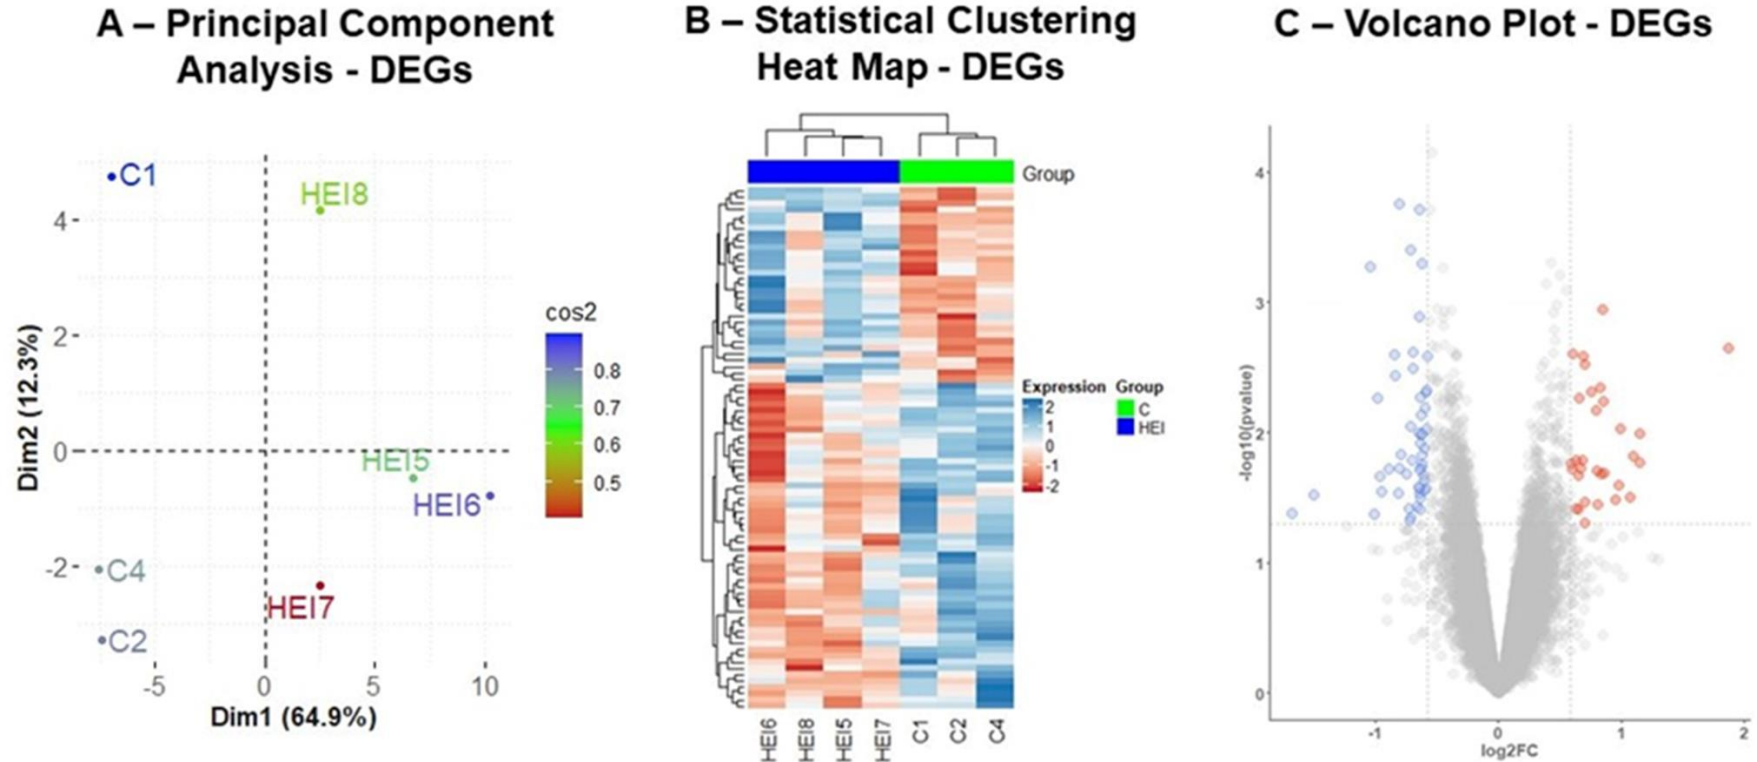

**Supplemental Figure-2:** Principal Component Analysis for 45 DEGs identified in the LEI vs. HEI comparisons (A). Heatmap of the differentially expressed genes in the two groups (LEI vs. HEI) that cluster separately. Each column represents the individual sample, and each row represents the individual DEG in the LEI vs. HEI comparison (B). The volcano plot shows the statistical significance (Y-Axis) against the fold change (X-Axis) between the LEI and HEI groups (C). Each blue dot represents the significantly decreased expression of an individual gene, and each red dot the significantly increased expression of a gene on the Volcano Plot. The dotted horizontal and vertical line represents the cut-off fold change ( $\pm 1.5$  folds) and statistical significance ( $p < 0.05$ ), respectively.

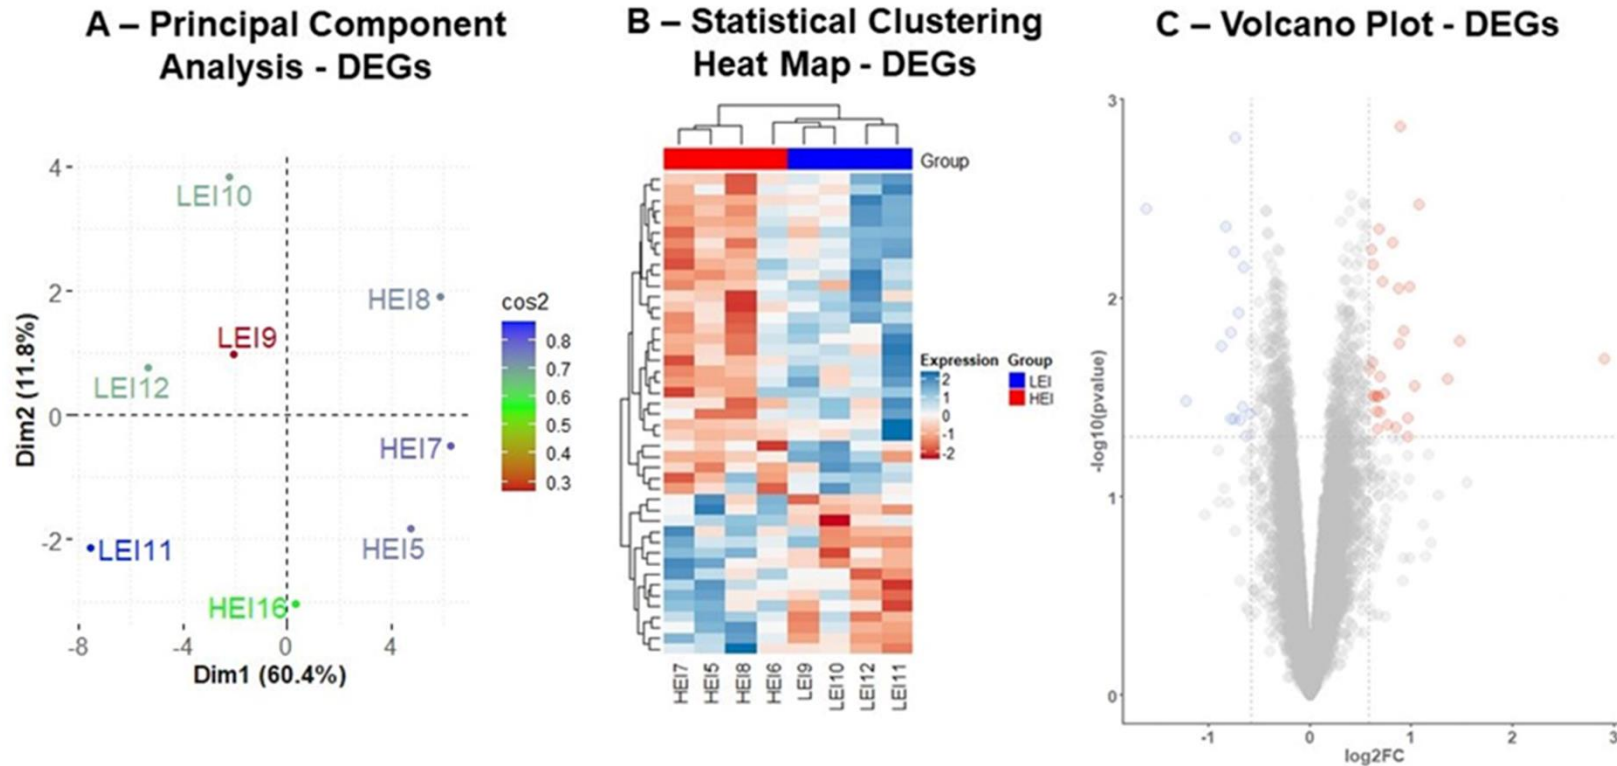

**Supplemental Figure-3:** Principal Component Analysis for 1325 DMRs identified in the HEI vs. C comparisons (A). Heatmap of differentially methylated genes demonstrates that the two groups (HEI and C) cluster separately. Each column represents the individual sample, and each row represents the unique DMR in the HEI vs. C comparisons (B).

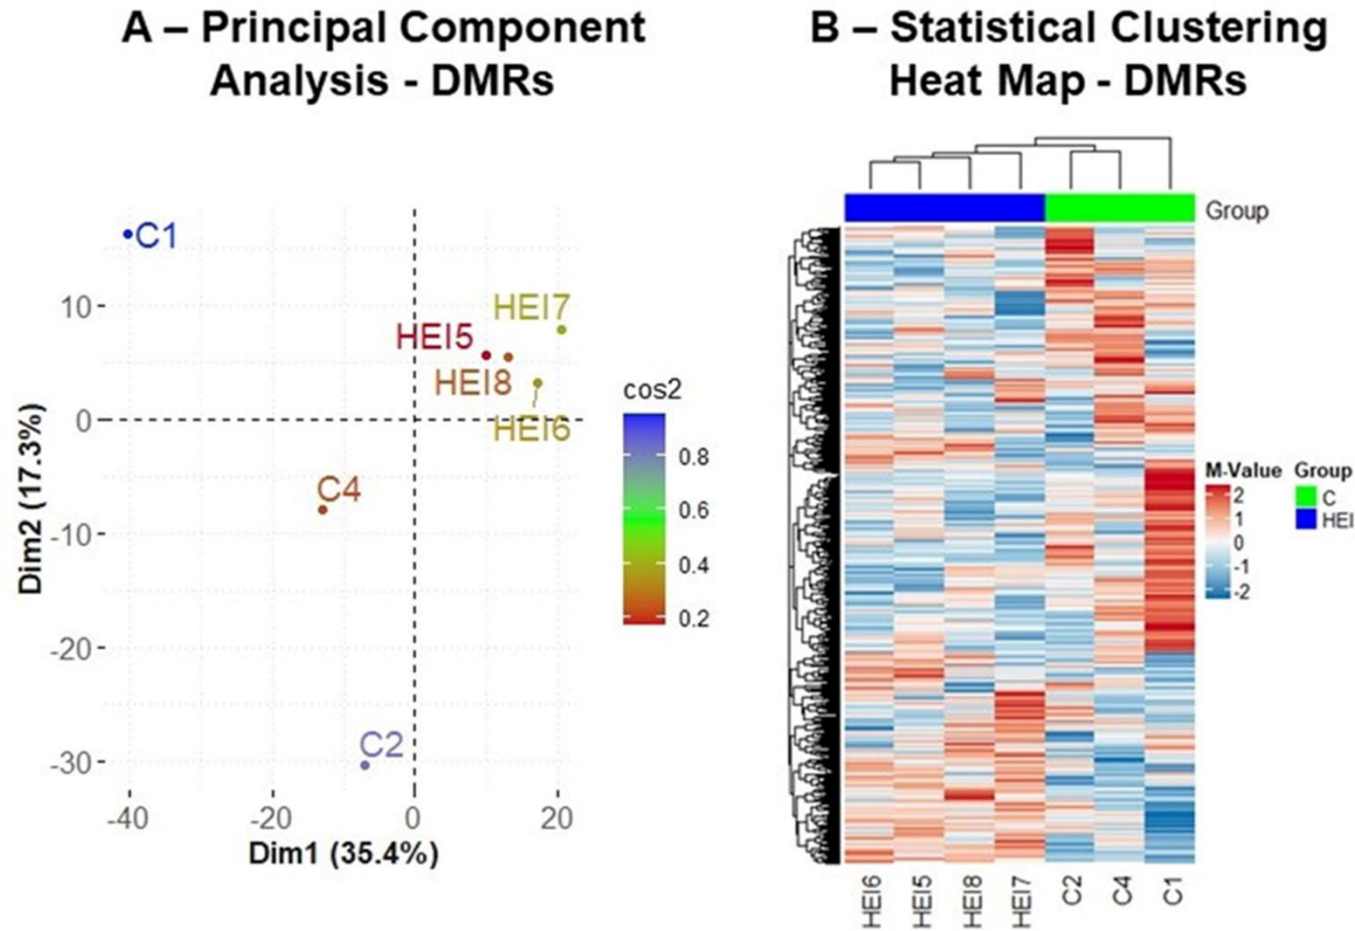

**Supplemental Figure-4:** Principal Component Analysis for 1233 DMRs identified in the LEI vs. HEI comparisons (A). Heatmap of differentially methylated genes demonstrating that the two groups (LEI vs. HEI) cluster separately. Each column represents the individual sample, and the row represents the unique DMR in LEI vs. HEI comparisons (B).

### A – Principal Component Analysis - DMRs

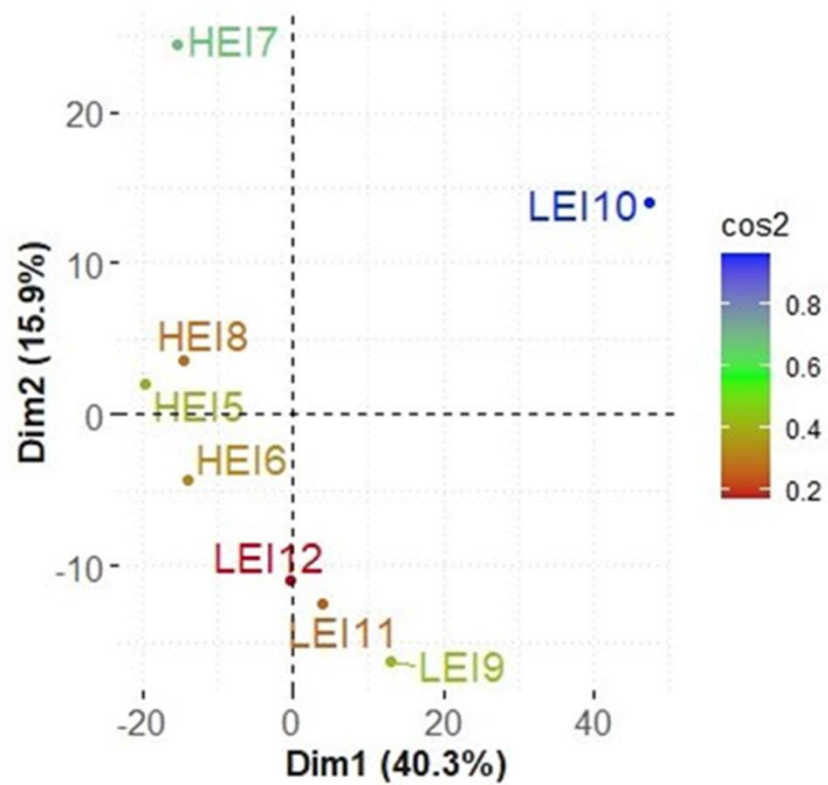

### B – Statistical Clustering Heat Map - DMRs

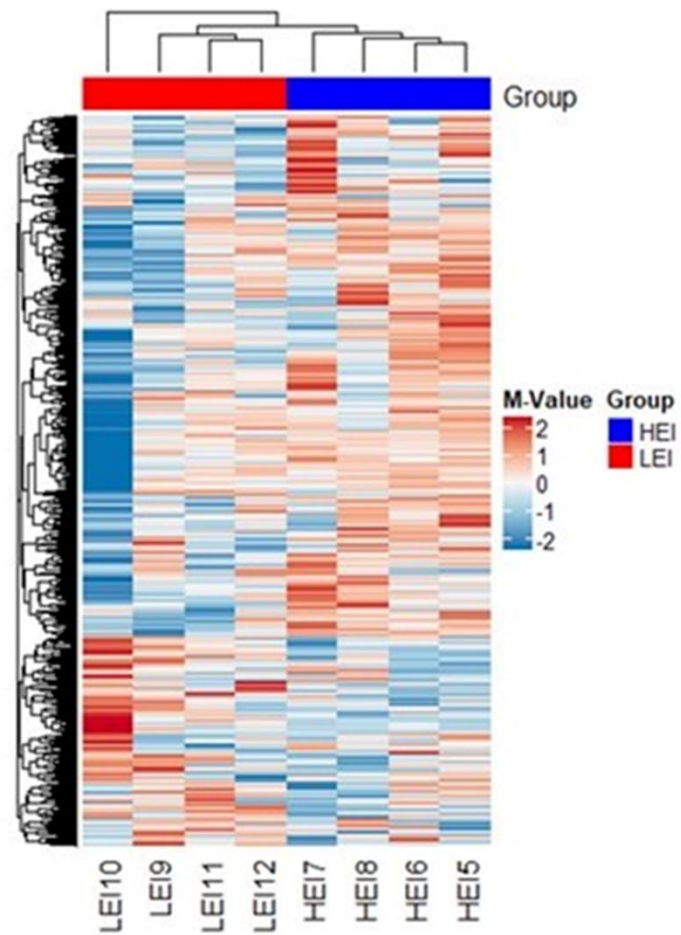

**Supplementary Table SI** Subject details for the eutopic endometrial biopsies obtained from women with and without endometriosis and used for gene expression array, methylation array, and quantitative RT-PCR analysis.

| <b>Sample Id</b> | <b>Disease Status</b> | <b>Integrin <math>\alpha_v\beta_3</math><br/>H-Score</b> | <b>Menstrual Cycle Day</b> | <b>Laparoscopic Evaluation</b> |
|------------------|-----------------------|----------------------------------------------------------|----------------------------|--------------------------------|
| G212A            | Control               | 3.2                                                      | Secretory                  | No                             |
| G422A            | Control               | 2.1                                                      | Secretory                  | Yes                            |
| G214A            | Control               | 2.0                                                      | Secretory                  | No                             |
| R01c             | Endometriosis - III   | 3.6                                                      | Secretory                  | Yes - 1/19/10                  |
| M102c            | Endometriosis - III   | 1                                                        | Secretory                  | Yes - 7/29/10                  |
| G448B            | Endometriosis - II    | 2.1                                                      | Secretory                  | Yes - 10/2007                  |
| G416A            | Endometriosis         | 3.2                                                      | Secretory                  | Yes - 2002 & 2005              |
| R03c             | Endometriosis - III   | 0                                                        | Secretory                  | yes - 3/8/07 & 4/13/10         |
| R07c             | Endometriosis - I     | 0.5                                                      | Secretory                  | yes - 9/11/08 & 2/23/10        |
| R08c             | Endometriosis - Mild  | 0                                                        | Secretory                  | yes - 2/10/10                  |
| G418A            | Endometriosis - II    | 0.0                                                      | Secretory                  | yes - 8/31/07                  |

**Supplementary Table SII** Subject details for the sample used for western blot analysis.

| <b>Western Blot Lane</b> | <b>Sample ID</b> | <b>Stage of Menstrual Cycle</b> | <b>Diagnosis</b> |
|--------------------------|------------------|---------------------------------|------------------|
| 2                        | H1224            | Proliferative                   | No Endometriosis |
| 3                        | H1257            | Proliferative                   | No Endometriosis |
| 4                        | H1281            | Proliferative                   | No Endometriosis |
| 5                        | N081             | Proliferative                   | No Endometriosis |
| 6                        | N099             | Proliferative                   | No Endometriosis |
| 7                        | N057             | Proliferative                   | No Endometriosis |
| 8                        | G486B            | Proliferative                   | Endometriosis    |
| 9                        | G490C            | Proliferative                   | Endometriosis    |
| 10                       | G492A            | Proliferative                   | Endometriosis    |
| 12                       | H1200            | Secretory                       | No Endometriosis |
| 13                       | H1235            | Secretory                       | No Endometriosis |
| 14                       | H1240            | Secretory                       | No Endometriosis |
| 15                       | N065             | Secretory                       | No Endometriosis |
| 16                       | N106             | Secretory                       | No Endometriosis |
| 17                       | N080             | Secretory                       | No Endometriosis |
| 18                       | I18B             | Secretory                       | Endometriosis    |
| 19                       | I06A             | Secretory                       | Endometriosis    |
| 20                       | G483C            | Secretory                       | Endometriosis    |

**Supplementary Table SIII** Sequence of primers used for quantitative PCR analysis.

| <b>Gene</b> | <b>Gene Name</b>                                 | <b>Forward Primer 5' to 3'</b> | <b>Reverse Primer 5' to 3'</b> |
|-------------|--------------------------------------------------|--------------------------------|--------------------------------|
| CCDC146     | coiled-coil domain containing 146                | TGCCATAGTGCCACAAATTAAC         | TTGGCTTTTAACGCTGCCATT          |
| PGK2        | phosphoglycerate kinase 2                        | AAACTGGATGTTAGAGGGAAGCG        | GGCCGACCTAGATGACTCATAAG        |
| PLEKHF2     | pleckstrin homology and FYVE domain containing 2 | CAAAGCAAGGCAGTTTTTCTTGT        | TGGTGTCTTGATTAGCCATCCA         |
| HIST1H4F    | H4 clustered histone 6                           | AAAGTGCTGCGTGACAACATA          | AGGCCCCGAAATGCGTTTCA           |
| ANXA3       | annexin A3                                       | TTAGCCCATCAGTGGATGCTG          | CTGTGCATTTGACCTCTCAGT          |
| PGLYRP2     | peptidoglycan recognition protein 2              | GGACCTTTACGCTTTTGGACC          | GAGTCCGGCTCAGGTAGTCT           |
| SLC18A2     | solute carrier family 18 member A2               | CGGAAGCTCATCCTGTTTCATC         | CCTGGCCGTCTGGATTTCTG           |
| RNPC3       | RNA binding region (RNP1, RRM) containing 3      | GTGCGGGTCCTGTCAGATAAG          | TGAACTCGATCTTGCTCTTTTGC        |
| AHR         | aryl hydrocarbon receptor                        | GTGCACAGCTCTGCTTCAGT           | CTACTCCACTTCAGCCACCA           |
| 18s         | RNA, 18S ribosomal N5                            | TGATTAAGTCCCTGCCCTTTGT         | TCAAGTTGCACCGTCTTCTCAG         |



**Supplementary Table SIV** List of the top 10 Biological Processes of differentially expressed genes in the eutopic endometrium of low endometrial integrin expression (LEI) patients.

| GO ID      | Description                                | GeneRatio | pvalue   | Gene symbols                                                                                                                                                                                                                                                                 |
|------------|--------------------------------------------|-----------|----------|------------------------------------------------------------------------------------------------------------------------------------------------------------------------------------------------------------------------------------------------------------------------------|
| GO:0043062 | extracellular structure organization       | 20/331    | 6.05E-05 | FMOD; <b>P4HA1</b> ; SERPINH1; EFEMP2; LUM; <b>ERO1A</b> ; MFAP4; <b>ABCA5</b> ; P4HB; COMP; <b>ITGA6</b> ; <b>CFLAR</b> ; COL6A3; PLTP; COL6A1; <b>ITGA2</b> ; HAPLN1; <b>PLA2G7</b> ; TIMP1; <b>GPM6B</b>                                                                  |
| GO:0043087 | regulation of GTPase activity              | 18/331    | 0.004    | <b>ERRFI1</b> ; THY1; <b>ARHGAP32</b> ; <b>FGD4</b> ; <b>RGS6</b> ; <b>RANBP2</b> ; <b>ITGA6</b> ; <b>RALGAPA2</b> ; <b>RASA2</b> ; <b>CPEB2</b> ; <b>CXCL13</b> ; <b>FAM13A</b> ; <b>RICTOR</b> ; <b>EFNA5</b> ; <b>FAM13B</b> ; <b>STXBP5</b> ; <b>BVES</b> ; <b>NTRK2</b> |
| GO:0003012 | muscle system process                      | 17/331    | 0.005    | <b>MIR30E</b> ; <b>ATP1A1</b> ; <b>ERRFI1</b> ; ACTA2; <b>DSG2</b> ; <b>DSC2</b> ; CNN1; <b>CFLAR</b> ; MYL9; <b>CAMK2D</b> ; <b>ITGA2</b> ; <b>DSP</b> ; <b>DOCK5</b> ; <b>STC1</b> ; <b>TMOD1</b> ; TPM2; FLNA                                                             |
| GO:0042391 | regulation of membrane potential           | 16/331    | 0.008    | <b>ATP1A1</b> ; KCNH1; <b>DSG2</b> ; <b>DSC2</b> ; <b>CXADR</b> ; <b>USP53</b> ; <b>CAMK2D</b> ; <b>SLC26A2</b> ; <b>GABRP</b> ; <b>DSP</b> ; <b>GCLC</b> ; <b>BVES</b> ; <b>PPP1R9A</b> ; <b>PTPN3</b> ; <b>GABRQ</b> ; FLNA                                                |
| GO:0032970 | regulation of actin filament-based process | 16/331    | 0.002    | <b>ATP1A1</b> ; RHOC; <b>DSG2</b> ; <b>DSC2</b> ; MYADM; SYNPO2; <b>CAMK2D</b> ; <b>RICTOR</b> ; <b>EFNA5</b> ; <b>DSP</b> ; <b>PPP1R9A</b> ; <b>STC1</b> ; <b>TMOD1</b> ; <b>C9orf72</b> ; <b>GPM6B</b> ; FLNA                                                              |
| GO:0030198 | extracellular matrix organization          | 16/331    | 0.0007   | FMOD; <b>P4HA1</b> ; SERPINH1; EFEMP2; LUM; <b>ERO1A</b> ; MFAP4; COMP; <b>ITGA6</b> ; <b>CFLAR</b> ; COL6A3; COL6A1; <b>ITGA2</b> ; HAPLN1; TIMP1; <b>GPM6B</b>                                                                                                             |
| GO:0006936 | muscle contraction                         | 15/331    | 0.002    | <b>MIR30E</b> ; <b>ATP1A1</b> ; ACTA2; <b>DSG2</b> ; <b>DSC2</b> ; CNN1; MYL9; <b>CAMK2D</b> ; <b>ITGA2</b> ; <b>DSP</b> ; <b>DOCK5</b> ; <b>STC1</b> ; <b>TMOD1</b> ; TPM2; FLNA                                                                                            |
| GO:0031589 | cell-substrate adhesion                    | 14/331    | 0.002    | THY1; PPFIA2; MYADM; <b>EPB41L5</b> ; <b>ITGA6</b> ; LGALS1; <b>PIK3CB</b> ; <b>ITGA2</b> ; <b>EFNA5</b> ; <b>BVES</b> ; <b>DOCK5</b> ; <b>PRKX</b> ; <b>GPM6B</b> ; FLNA                                                                                                    |
| GO:0090257 | regulation of muscle system process        | 13/331    | 0.000    | <b>MIR30E</b> ; <b>ATP1A1</b> ; <b>ERRFI1</b> ; <b>DSG2</b> ; <b>DSC2</b> ; CNN1; MYL9; <b>CAMK2D</b> ; <b>ITGA2</b> ; <b>DSP</b> ; <b>DOCK5</b> ; <b>STC1</b> ; FLNA                                                                                                        |
| GO:0030048 | actin filament-based movement              | 12/331    | 8.43E-06 | <b>FBNP1L</b> ; <b>ATP1A1</b> ; <b>DSG2</b> ; <b>DSC2</b> ; <b>EPB41L5</b> ; <b>CAMK2D</b> ; <b>DSP</b> ; <b>MYO6</b> ; <b>STC1</b> ; <b>TMOD1</b> ; TPM2; FLNA                                                                                                              |

Upregulated genes are shown in bold font and the down-regulated genes in a standard font.

**Supplementary Table SV** List of the top 10 Cellular Components of differentially expressed genes in the eutopic endometrium of LEI patients.

| GO ID      | Description                        | GeneRatio | pvalue   | Gene symbols                                                                                                                                                                                 |
|------------|------------------------------------|-----------|----------|----------------------------------------------------------------------------------------------------------------------------------------------------------------------------------------------|
| GO:0031012 | extracellular matrix               | 21/347    | 0.0002   | FMOD; <b>MMP26</b> ; EFEMP2; CD248; LUM; MFAP4; <b>OMG</b> ; COMP; <b>ITGA6</b> ; COL6A3; COL6A1; TIMP3; LGALS1; P3H2; ADAMTS6; HAPLN1; <b>EFNA5</b> ; <b>SERPINB1</b> ; PCOLCE; ASPN; TIMP1 |
| GO:0005578 | proteinaceous extracellular matrix | 19/347    | 8.10E-05 | FMOD; <b>MMP26</b> ; EFEMP2; CD248; LUM; MFAP4; <b>OMG</b> ; COMP; <b>ITGA6</b> ; COL6A3; COL6A1; TIMP3; LGALS1; P3H2; ADAMTS6; HAPLN1; <b>EFNA5</b> ; ASPN; TIMP1                           |
| GO:0098589 | membrane region                    | 13/347    | 0.006    | <b>ATP1A1</b> ; SERPINH1; CAVIN3; <b>PPP2R1B</b> ; THY1; MYADM; <b>RANBP2</b> ; <b>CFLAR</b> ; <b>CXADR</b> ; <b>TLR2</b> ; <b>EFNA5</b> ; <b>BVES</b> ; <b>GPM6B</b>                        |
| GO:0005788 | endoplasmic reticulum lumen        | 12/347    | 0.009    | <b>P4HA1</b> ; SERPINH1; <b>TXNDC16</b> ; <b>ERO1A</b> ; PPIB; P4HB; COL6A3; COL6A1; LGALS1; P3H2; <b>RNASET2</b> ; TIMP1                                                                    |
| GO:0098858 | actin-based cell projection        | 12/347    | 0.0003   | RHOC; ACTA2; <b>FGD4</b> ; <b>ITGA6</b> ; <b>CXADR</b> ; <b>ACPP</b> ; MUC20; <b>SLC4A7</b> ; <b>S100P</b> ; <b>SLC26A2</b> ; <b>MYO6</b> ; <b>PPP1R9A</b>                                   |
| GO:0030427 | site of polarized growth           | 8/347     | 0.009    | THY1; <b>CXADR</b> ; <b>FRYL</b> ; DBN1; <b>PPP1R9A</b> ; STMN2; <b>C9orf72</b> ; <b>USP9X</b>                                                                                               |
| GO:0044420 | extracellular matrix component     | 8/347     | 0.001    | EFEMP2; LUM; MFAP4; <b>ITGA6</b> ; TIMP3; P3H2; <b>EFNA5</b> ; TIMP1                                                                                                                         |
| GO:1990204 | oxidoreductase complex             | 7/347     | 0.004    | <b>SDHD</b> ; <b>DBT</b> ; <b>P4HA1</b> ; P4HB; NDUFA13; <b>GPD2</b> ; <b>BCKDHB</b>                                                                                                         |
| GO:0030175 | filopodium                         | 6/347     | 0.009    | ACTA2; <b>FGD4</b> ; <b>ITGA6</b> ; <b>CXADR</b> ; <b>ACPP</b> ; <b>PPP1R9A</b>                                                                                                              |
| GO:0005604 | basement membrane                  | 6/347     | 0.007    | EFEMP2; <b>ITGA6</b> ; TIMP3; P3H2; <b>EFNA5</b> ; TIMP1                                                                                                                                     |

Upregulated genes are shown in bold font and down-regulated genes in normal font.

**Supplementary Table SVI** List of the top 10 Molecular Functions of differentially expressed genes in the eutopic endometrium of LEI patients.

| GO ID      | Description                                                                 | GeneRatio | pvalue   | Gene symbols                                                                                                                                    |
|------------|-----------------------------------------------------------------------------|-----------|----------|-------------------------------------------------------------------------------------------------------------------------------------------------|
| GO:0016747 | transferase activity, transferring acyl groups other than amino-acyl groups | 10/328    | 0.008    | <b>DBT</b> ; <b>ZDHHC13</b> ; <b>ESCO1</b> ; <b>MBOAT1</b> ; <b>AGPAT5</b> ; <b>ZDHHC2</b> ; <b>ELP3</b> ; <b>ZDHHC21</b> ; <b>SAT1</b> ; NAA10 |
| GO:0061134 | peptidase regulator activity                                                | 10/328    | 0.008    | SERPINH1; BIRC5; COL6A3; <b>CST11</b> ; TIMP3; <b>PCOLCE2</b> ; PTTG1; <b>SERPINB1</b> ; PCOLCE; TIMP1                                          |
| GO:0005518 | collagen binding                                                            | 8/328     | 2.17E-05 | SERPINH1; LUM; PPIB; COMP; <b>PCOLCE2</b> ; <b>ITGA2</b> ; PCOLCE; ASPN                                                                         |
| GO:0048306 | calcium-dependent protein binding                                           | 6/328     | 0.0007   | S100A4; <b>ANXA4</b> ; <b>S100P</b> ; <b>ANXA3</b> ; STMN2; <b>VLDLR</b>                                                                        |
| GO:0098631 | cell adhesion mediator activity                                             | 5/328     | 0.0008   | <b>DSG2</b> ; <b>DSC2</b> ; <b>CXADR</b> ; <b>ITGA2</b> ; <b>DSP</b>                                                                            |
| GO:0016706 | 2-oxoglutarate-dependent dioxygenase activity                               | 4/328     | 0.009    | <b>P4HA1</b> ; P4HB; P3H2; <b>PHF8</b>                                                                                                          |
| GO:0098632 | cell-cell adhesion mediator activity                                        | 4/328     | 0.002    | <b>DSG2</b> ; <b>DSC2</b> ; <b>CXADR</b> ; <b>DSP</b>                                                                                           |
| GO:0086080 | protein binding involved in heterotypic cell-cell adhesion                  | 4/328     | 2.30E-05 | <b>DSG2</b> ; <b>DSC2</b> ; <b>CXADR</b> ; <b>DSP</b>                                                                                           |
| GO:0008329 | signaling pattern recognition receptor activity                             | 3/328     | 0.003    | PGLYRP2; <b>TLR2</b> ; <b>TLR4</b>                                                                                                              |
| GO:0031543 | peptidyl-proline dioxygenase activity                                       | 3/328     | 0.001    | <b>P4HA1</b> ; P4HB; P3H2                                                                                                                       |

Upregulated genes are shown in bold font and down-regulated genes in normal font.

**Supplementary Table SVII** Signal pathway analysis of differentially expressed genes in the eutopic endometrium of LEI patients, classified by the Kyoto Encyclopedia of Genes and Genomes (KEGG) pathways.

| KEGG ID  | Description                               | GeneRatio | pvalue | Gene symbols                                                                                                                                                                             |
|----------|-------------------------------------------|-----------|--------|------------------------------------------------------------------------------------------------------------------------------------------------------------------------------------------|
| hsa04151 | PI3K-Akt signaling pathway                | 15/151    | 0.002  | <b>PKN2</b> ; <b>THEM4</b> ; <b>PPP2R1B</b> ; <b>IGF1R</b> ; COMP; <b>ITGA6</b> ; COL6A3; COL6A1; <b>PIK3CB</b> ; <b>TLR2</b> ; <b>ITGA2</b> ; <b>EFNA5</b> ; NTRK2; <b>TLR4</b> ; FGF16 |
| hsa04510 | Focal adhesion                            | 10/151    | 0.004  | <b>IGF1R</b> ; COMP; <b>ITGA6</b> ; COL6A3; MYL9; COL6A1; <b>PIK3CB</b> ; <b>ITGA2</b> ; <b>PIP5K1B</b> ; FLNA                                                                           |
| hsa05142 | Chagas disease (American trypanosomiasis) | 7/151     | 0.002  | C1QC; <b>PPP2R1B</b> ; <b>CFLAR</b> ; <b>PIK3CB</b> ; <b>TLR2</b> ; <b>IFNGR1</b> ; <b>TLR4</b>                                                                                          |
| hsa04066 | HIF-1 signaling pathway                   | 7/151     | 0.004  | <b>IGF1R</b> ; <b>PIK3CB</b> ; <b>CAMK2D</b> ; <b>PGK2</b> ; <b>IFNGR1</b> ; <b>TLR4</b> ; TIMP1                                                                                         |
| hsa00640 | Propanoate metabolism                     | 4/151     | 0.003  | <b>DBT</b> ; <b>ALDH6A1</b> ; <b>SUCLG2</b> ; <b>BCKDHB</b>                                                                                                                              |

Upregulated genes are shown in bold font and down-regulated genes in normal font.

**Supplementary Table SVIII** List of genes that are differentially methylated and show an altered expression in the LEI versus Control comparison.

| Gene Symbol              | Name                                                                     | Functions                                                                                                                                                                                                                                                                                                                                                                          | Dataset                        | Expression Pattern                                                         | Reference                                                    |
|--------------------------|--------------------------------------------------------------------------|------------------------------------------------------------------------------------------------------------------------------------------------------------------------------------------------------------------------------------------------------------------------------------------------------------------------------------------------------------------------------------|--------------------------------|----------------------------------------------------------------------------|--------------------------------------------------------------|
| PLEKHF2                  | pleckstrin homology and FYVE domain containing 2                         | Involved in induction of Autophagy                                                                                                                                                                                                                                                                                                                                                 | -                              |                                                                            | -                                                            |
| SNORD82                  | small nucleolar RNA, C/D box 82                                          | The majority of small nucleolar RNAs (snoRNAs) function as guide RNAs in the nucleotide modification of preribosomal RNA (pre-rRNA). C/D box snoRNAs, like SNORD82, are involved in site-specific 2-prime-O-ribose methylation of pre-rRNA                                                                                                                                         | -                              |                                                                            | -                                                            |
| <b><u>HIST1H3I</u></b> # | H3 clustered histone 11                                                  | -                                                                                                                                                                                                                                                                                                                                                                                  | -                              |                                                                            | (Mortlock <i>et al.</i> , 2019)                              |
| <b><u>RNPC3</u></b>      | RNA binding region (RNP1, RRM) containing 3                              | This gene encodes a 65K protein that is a component of the U12-type spliceosome. This protein contains two RNA recognition motifs (RRMs), suggesting that it may contact one of the small nuclear RNAs of the minor spliceosome.                                                                                                                                                   | GDS2835                        | Upregulated in ovarian endometriosis                                       | (Hever <i>et al.</i> , 2007)                                 |
| <b><u>SLC18A2</u></b> x  | solute carrier family 18 member A2                                       | This gene encodes a transmembrane protein that functions as an ATP-dependent transporter of monoamines, such as dopamine, norepinephrine, serotonin, and histamine. This protein transports amine neurotransmitters into synaptic vesicles.                                                                                                                                        | GDS2737                        | Upregulated in mid secretory phase in both control and endometriosis cases | (Burney <i>et al.</i> , 2007; Mortlock <i>et al.</i> , 2020) |
| <b><u>SMCHD1</u></b> x   | structural maintenance of chromosomes flexible hinge domain containing 1 | his gene encodes a protein which contains a hinge region domain found in members of the SMC (structural maintenance of chromosomes) protein family.                                                                                                                                                                                                                                | GDS2835                        | Upregulated in ovarian endometriosis                                       | (Hever <i>et al.</i> , 2007; Mortlock <i>et al.</i> , 2020)  |
| SNORD58A                 | small nucleolar RNA, C/D box 58A                                         | -                                                                                                                                                                                                                                                                                                                                                                                  | -                              |                                                                            | -                                                            |
| <b><u>PGLYRP2</u></b> #  | peptidoglycan recognition protein 2                                      | This gene encodes a peptidoglycan recognition protein, which belongs to the N-acetylmuramoyl-L-alanine amidase 2 family. This protein hydrolyzes the link between N-acetylmuramoyl residues and L-amino acid residues in bacterial cell wall glycopeptides, and thus may play a scavenger role by digesting biologically active peptidoglycan into biologically inactive fragments | -                              |                                                                            | (Mortlock <i>et al.</i> , 2019)                              |
| <b><u>ANXA3</u></b> #    | annexin A3                                                               | This protein functions in the inhibition of phospholipase A2 and cleavage of inositol 1,2-cyclic phosphate to form inositol 1-phosphate.                                                                                                                                                                                                                                           | CDS3060<br>GSE87809<br>CDS2737 | --Upregulated in eutopic endometrium of patients with endometriosis        | (Mortlock <i>et al.</i> , 2019; Predeus <i>et</i>            |

|                                        |                                                |                                                                                                                                                                                                                                                                                    |                                 |                                                                                    |                                                                                                                                                     |
|----------------------------------------|------------------------------------------------|------------------------------------------------------------------------------------------------------------------------------------------------------------------------------------------------------------------------------------------------------------------------------------|---------------------------------|------------------------------------------------------------------------------------|-----------------------------------------------------------------------------------------------------------------------------------------------------|
|                                        |                                                |                                                                                                                                                                                                                                                                                    |                                 | --Downregulated in ovarian endometriosis                                           | <i>al.</i> , 2018; Sha <i>et al.</i> , 2007)                                                                                                        |
| <b><u>HIST1H4F</u></b> <sup>X, #</sup> | H4 clustered histone 6                         | -                                                                                                                                                                                                                                                                                  | GDS2835                         | Downregulated in ectopic endometriosis                                             | (Hull <i>et al.</i> , 2008; Mortlock <i>et al.</i> , 2020; Mortlock <i>et al.</i> , 2019)                                                           |
| <b><u>PGK2</u></b>                     | phosphoglycerate kinase 2                      | phosphoglycerate kinase that catalyzes the reversible conversion of 1,3-bisphosphoglycerate to 3-phosphoglycerate                                                                                                                                                                  | GDS2835                         |                                                                                    | (Hever <i>et al.</i> , 2007)                                                                                                                        |
| <b><u>AHR</u></b> <sup>X, #</sup>      | aryl hydrocarbon receptor                      | The protein encoded by this gene is a ligand-activated helix-loop-helix transcription factor involved in the regulation of biological responses to planar aromatic hydrocarbons. This receptor has been shown to regulate xenobiotic-metabolizing enzymes such as cytochrome P450. | GDS2835<br>GSE11691<br>GSE87809 | Upregulated in ectopic and eutopic endometrium of women with ovarian endometriosis | (Hever <i>et al.</i> , 2007; Hull <i>et al.</i> , 2008; Mortlock <i>et al.</i> , 2020; Mortlock <i>et al.</i> , 2019; Predeus <i>et al.</i> , 2018) |
| <b><u>CCDC146</u></b> <sup>X, #</sup>  | coiled-coil domain containing 146              | Part of the centrosome complex                                                                                                                                                                                                                                                     | GDS2835                         | Downregulated in ovarian endometriosis                                             | (Hever <i>et al.</i> , 2007; Mortlock <i>et al.</i> , 2020; Mortlock <i>et al.</i> , 2019)                                                          |
| <b><u>AGPAT5</u></b> <sup>X, #</sup>   | 1-acylglycerol-3-phosphate O-acyltransferase 5 | This gene encodes a member of the 1-acylglycerol-3-phosphate O-acyltransferase family. This integral membrane protein converts lysophosphatidic acid to phosphatidic acid, the second step in de novo phospholipid biosynthesis.                                                   | GDS2737                         | Upregulated in mid secretory phase in both normal and endometriosis cases          | (Burney <i>et al.</i> , 2007; Mortlock <i>et al.</i> , 2020; Mortlock <i>et al.</i> , 2019)                                                         |

Gene name and reported biological functions were obtained from the Pubmed Gene Database (<https://www.ncbi.nlm.nih.gov/gene>). The genes in **bold** and underlined fonts are also reported to be altered in the publicly available endometriosis-related datasets and/ or mentioned in the published expression quantitative trait loci (eQTLs) and methylation quantitative trait loci (mQTLs) dataset. The reported eQTLs (X) and mQTLs (#) that matched with the genes of interest are listed in the data table.

#### **References:**

Burney RO, Talbi S, Hamilton AE, Vo KC, Nyegaard M, Nezhat CR, Lessey BA, and Giudice LC. Gene expression analysis of endometrium reveals progesterone resistance and candidate susceptibility genes in women with endometriosis. *Endocrinology*. 2007; **148**: 3814-3826.

Hever A, Roth RB, Hevezi P, Marin ME, Acosta JA, Acosta H, Rojas J, Herrera R, Grigoriadis D, White E, Conlon PJ, Maki RA, and Zlotnik A. Human endometriosis is associated with plasma cells and overexpression of B lymphocyte stimulator. *Proc Natl Acad Sci U S A*. 2007; **104**: 12451-12456.

Hull ML, Escareno CR, Godsland JM, Doig JR, Johnson CM, Phillips SC, Smith SK, Tavaré S, Print CG, and Charnock-Jones DS. Endometrial-peritoneal interactions during endometriotic lesion establishment. *Am J Pathol*. 2008; **173**: 700-715.

Mortlock S, Kendarsari RI, Fung JN, Gibson G, Yang F, Restuadi R, Girling JE, Holdsworth-Carson SJ, Teh WT, Lukowski SW, Healey M, Qi T, Rogers PAW, Yang J, McKinnon B, and Montgomery GW. Tissue specific regulation of transcription in endometrium and association with disease. *Hum Reprod*. 2020; **35**: 377-393.

Mortlock S, Restuadi R, Levien R, Girling JE, Holdsworth-Carson SJ, Healey M, Zhu Z, Qi T, Wu Y, Lukowski SW, Rogers PAW, Yang J, McRae AF, Fung JN, and Montgomery GW. Genetic regulation of methylation in human endometrium and blood and gene targets for reproductive diseases. *Clin Epigenetics*. 2019; **11**: 49.

Predeus AV, Vashukova ES, Glotov AS, Danilova MM, Osinovskaya NS, Malysheva OV, Shved NY, Ganbarli N, Yarmolinskaya MI, Ivashchenko TE, and Baranov VS. Next-Generation Sequencing of Matched Ectopic and Eutopic Endometrium Identifies Novel Endometriosis-Related Genes. *Russian Journal of Genetics*. 2018; **54**: 1358-1365.

Sha G, Wu D, Zhang L, Chen X, Lei M, Sun H, Lin S, and Lang J. Differentially expressed genes in human endometrial endothelial cells derived from eutopic endometrium of patients with endometriosis compared with those from patients without endometriosis. *Hum Reprod*. 2007; **22**: 3159-3169.
